# Supplementary material for: Social Support as a Stress Buffer or Stress Amplifier: The Moderating Role of Social Motives
Source: Research Square preprint supplement (doi:10.21203/rs.3.rs-781012/v1), 2021-11-30
Supplement: Supplementary file 1 [file 034dbd10987457d329a3ea2d.docx]

Appendix H

*Manipulation check social support*

Now please think about the student assistant. How did she behave towards you during the preparation stage for the job interview? Please mark with a cross where applicable.

|  | Not true | Barely true | Rather true | Exactly true |
| --- | --- | --- | --- | --- |
| Did the student assistant support you? |  |  |  |  |
| The student assistant showed me that she likes and accepts me. |  |  |  |  |
| The student assistant was there for me, when I needed her. |  |  |  |  |
| The student assistant cheered me up when I felt stressed. |  |  |  |  |
| The student assistant made me feel that I was making an important contribution. |  |  |  |  |
| The student assistant expressed concern for my wellbeing. |  |  |  |  |
| The student assistant made me feel that I could rely on her. |  |  |  |  |
| The student assistant helped me to find something positive in my situation. |  |  |  |  |
| The student assistant suggested an activity that could distract me a bit. |  |  |  |  |
| The student assistant encouraged me not to give up. |  |  |  |  |
| Did you experience the social support as being helpful? |  |  |  |  |
